# Supplementary material for: Evaluation of lacustrine groundwater discharge, hydrologic partitioning, and nutrient budgets in a proglacial lake in the Qinghai–Tibet Plateau: using 222 Rn and stable isotopes
Source: Copernicus journal article supplement (doi:10.5194/hess-22-5579-2018), 2018-10-26
Supplement: Supplementary file 1 [file hess-22-5579-2018-supplement.zip]

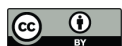

## *Supplement of*

# **Evaluation of lacustrine groundwater discharge, hydrologic partitioning, and nutrient budgets in a proglacial lake in the Qinghai–Tibet Plateau: using $^{222}\text{Rn}$ and stable isotopes**

**Xin Luo et al.**

*Correspondence to:* Jiu Jimmy Jiao (jjiao@hku.hk)

- [hess-22-5579-2018-supplement-title-page.pdf](#)
- [Supplementary Table 1.xlsx](#)
- [Supplementary Table 2.xlsx](#)
- [Supplementary information for HESS submission.docx](#)

The copyright of individual parts of the supplement might differ from the CC BY 4.0 License.
